# Supplementary material for: Reassessing the ratio of glyoxal to formaldehyde as an indicator of hydrocarbon precursor speciation
Source: Copernicus journal article supplement (doi:10.5194/acp-15-7571-2015), 2015-07-13
Supplement: Supplementary file 1 [file acp-15-7571-2015-supplement.pdf]

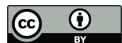

*Supplement of*

## **Reassessing the ratio of glyoxal to formaldehyde as an indicator of hydrocarbon precursor speciation**

**J. Kaiser et al.**

*Correspondence to:* J. Kaiser ([jen.b.kaiser@gmail.com](mailto:jen.b.kaiser@gmail.com))

The copyright of individual parts of the supplement might differ from the CC-BY 3.0 licence.

1 This supporting information provides average flight conditions (Table S1), an additional  
2 example in-and out of plume measurements of  $R_{GF}$  from the outflow of St. Louis (Fig. S1  
3 and Fig. S2), as well as the individual vertical profile locations and measurements (Fig.  
4 S3 and Fig. S4).  
5

1 Table S1. Summary of meteorological conditions for flights used in the analysis of  $R_{GF}$ .

| <b>Flight date</b> | <b>Focal region</b>       | <b>Time range<br/>(local)*</b> | <b>Average<br/>temperature (°C)</b> |
|--------------------|---------------------------|--------------------------------|-------------------------------------|
| 10 June 2014       | Haynesville shale         | 11:21-15:08                    | 25.2±1.3                            |
| 11 June 2014       | Birmingham                | 13:15-17:29                    | 26.3±1.4                            |
| 12 June 2014       | Atlanta                   | 09:51-15:26                    | 25.8±1.3                            |
| 16 June 2014       | Atlanta                   | 10:47-16:14                    | 22.9±1.0                            |
| 22 June 2014       | Atlanta/Birmingham        | 10:37-16:39                    | 22.3±1.4                            |
| 23 June 2014       | Indianapolis              | 10:50-13:20                    | 22.9±0.8                            |
| 25 June 2014       | Haynesville shale         | 11:41-16:03                    | 25.7±1.5                            |
| 26 June 2014       | Fayetteville shale/Ozarks | 10:42-14:42                    | 24.7±1.2                            |
| 29 June 2014       | Birmingham                | 12:21-16:55                    | 24.2±1.0                            |
| 05 July 2014       | St. Louis/Ozarks          | 10:44-15:23                    | 21.2±1.2                            |
| 06 July 2014       | Marcellus shale           | 11:11-14:09                    | 21.4±0.7                            |
| 08 July 2014       | Fayetteville shale        | 10:59-16:07                    | 25.4±1.9                            |
| 10 July 2014       | Hog farms                 | 10:12-13:16                    | 23.8±0.9                            |

2 \*Transit to and from region of flight's focus not included



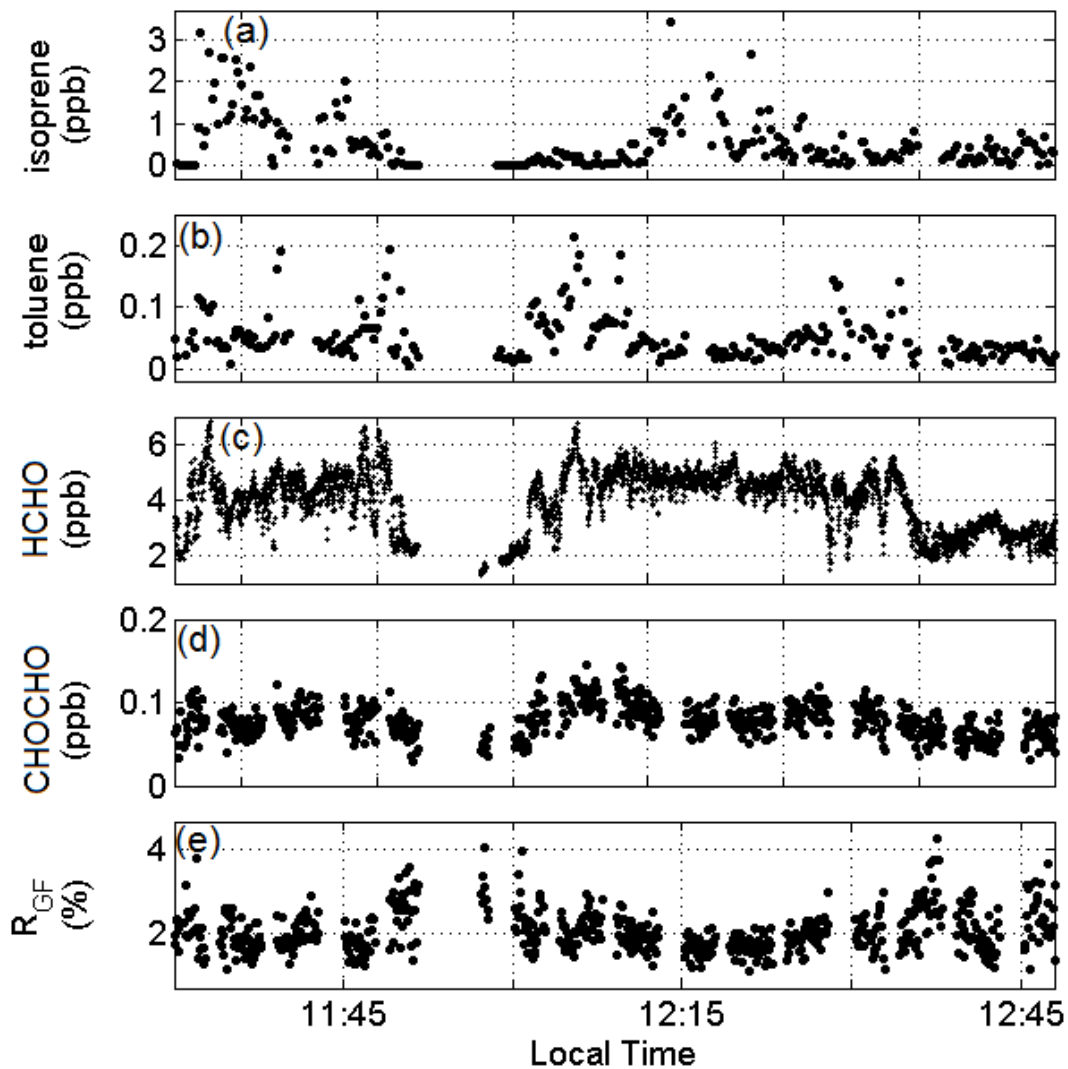

1

2 Figure S2. Measurements acquired on the July 5<sup>th</sup> flight corresponding to the boxed in  
 3 region in Fig. S1. As in the June 12<sup>th</sup> flight near Atlanta, VOC speciation has little  
 4 relationship with observed  $R_{GF}$ .

5

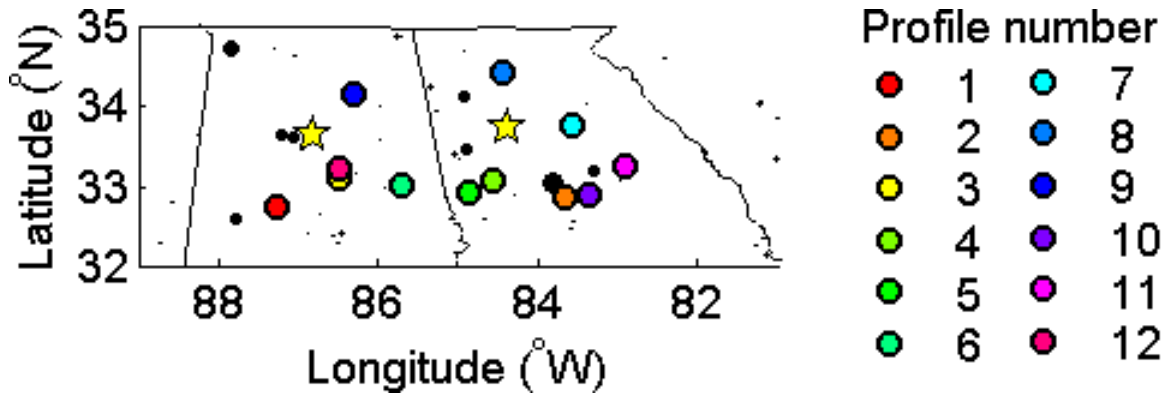

1

2 Figure S3. Locations of vertical profile measurements extending >3 km. Power plants  
 3 markers are scaled by NO<sub>x</sub> emissions.

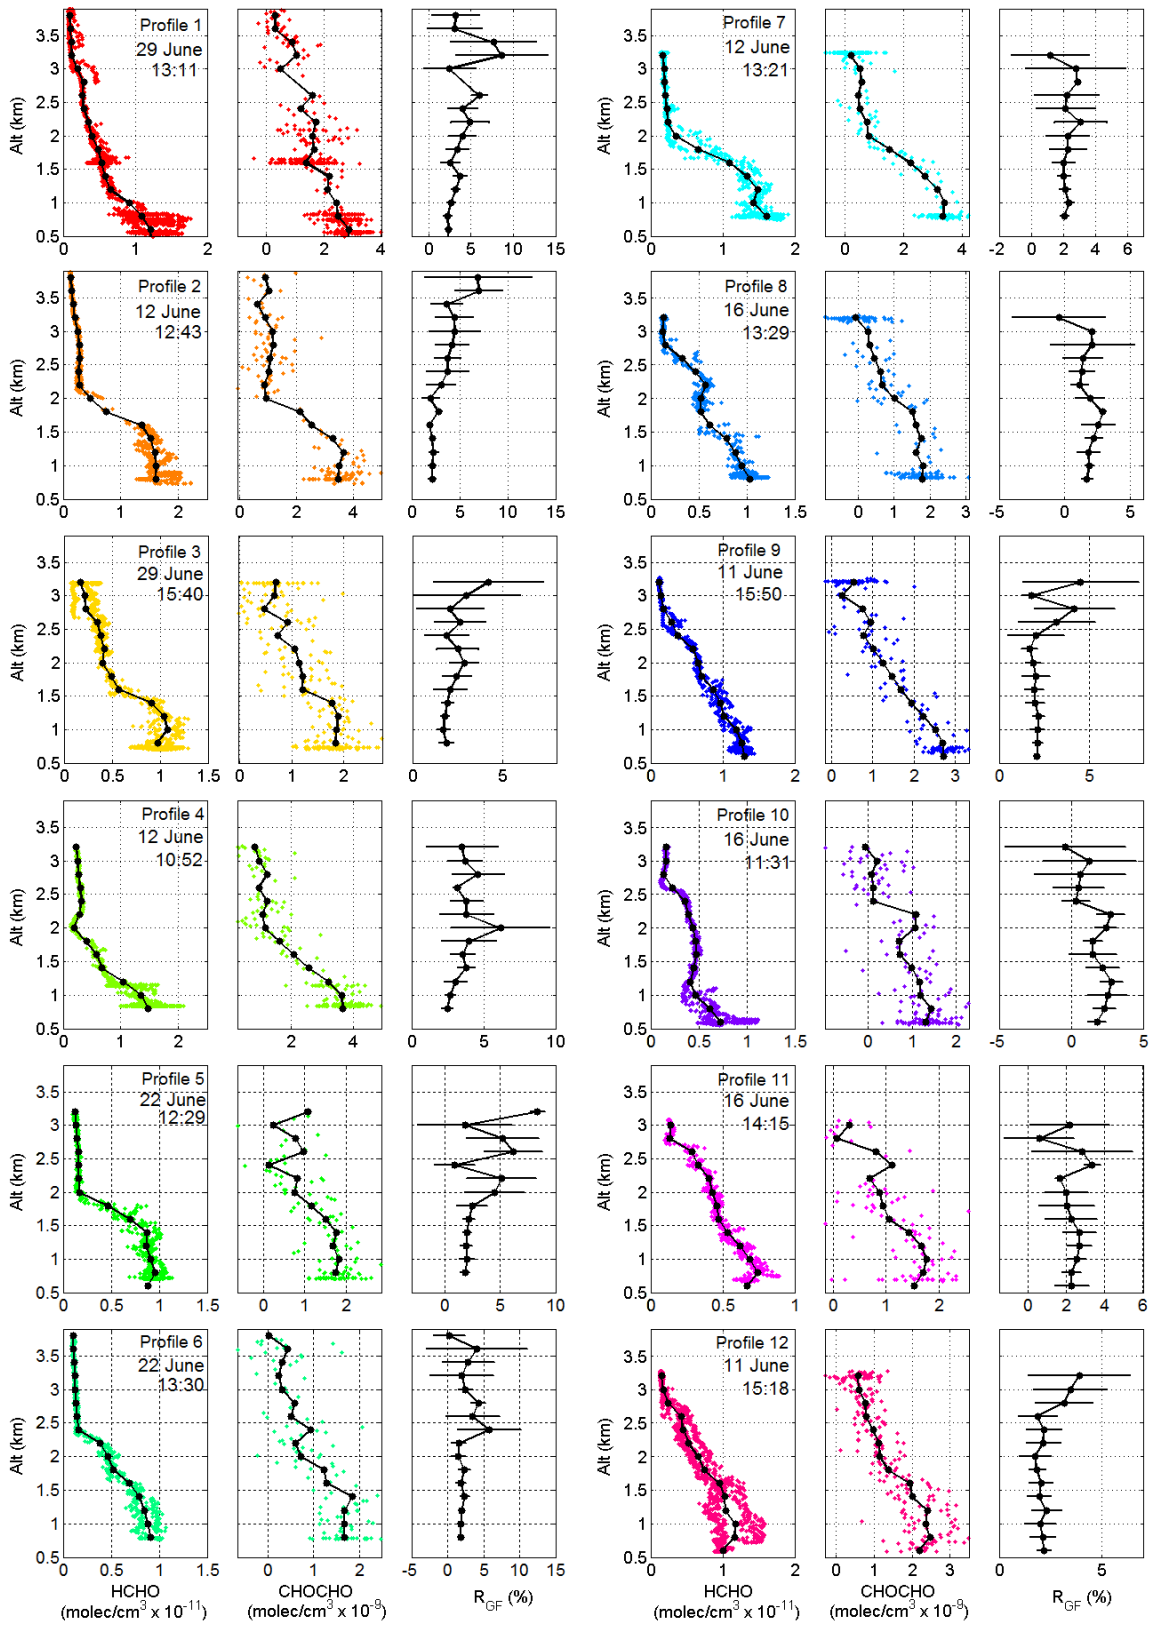

1

1 Figure S4. Vertical profiles of HCHO and CHOCHO concentrations and  $R_{GF}$  at locations  
2 shown in Fig. S3. Small markers indicate measurements, black circles represent the  
3 average value in a 200 m altitude bin, and in the  $R_{GF}$  panels, error bars represent the  
4 standard deviation of  $R_{GF}$  as calculated from the standard deviation of glyoxal and HCHO  
5 in that altitude bin.
